# Supplementary material for: A Similarity Regression Fusion Model for Integrating Multi-Omics Data to Identify Cancer Subtypes
Source: MDPI journal article supplement (doi:10.3390/genes9070314), 2018-06-21
Supplement: s1 [file s1]

## Supplementary Materials:

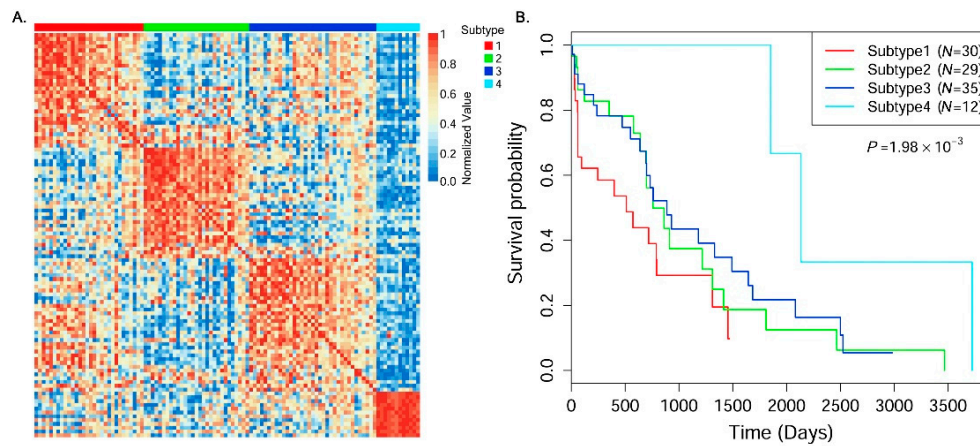

**Figure S1.** The identified subtypes in LSCC cancer datasets. **(A)** Heatmap of the predicted integrative similarity matrix between samples (row normalized, arranging samples by predicted subtype labels); **(B)** Kaplan–Meier survival probability curves of patients in the identified subtype clusters. The Cox log-rank test  $p$ -value was included.

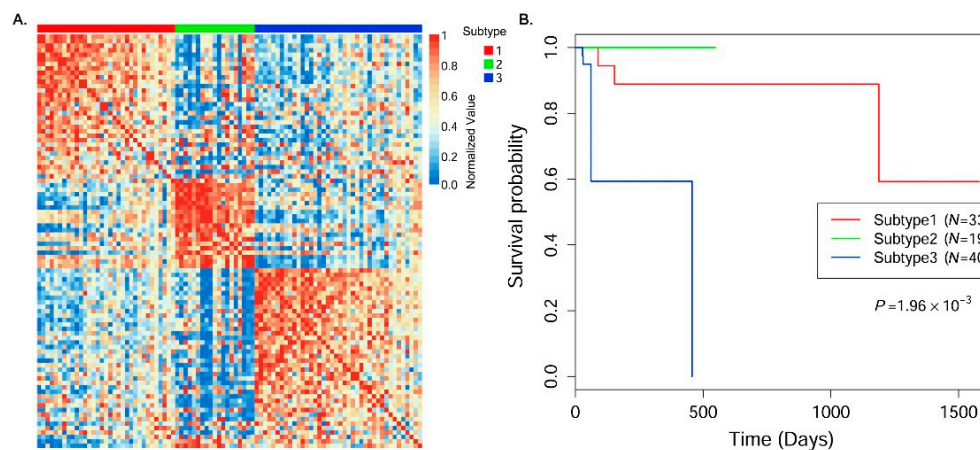

**Figure S2.** The identified subtypes in COAD cancer datasets. **(A)** Heatmap of the predicted integrative similarity matrix between samples (row normalized, arranging samples by predicted subtype labels); **(B)** Kaplan–Meier survival probability curves of patients in the identified subtype clusters. The Cox log-rank test  $p$ -value was included.

**Table S1.** Top 10 enriched GO terms (BH-FDR<0.01) in the GO biological process category of differentially expressed genes between subtypes 1 and 2 (gene expression in subtype 1 as baseline) in GBM cancer datasets.

| <b>Subtype 1 vs. Subtype 2</b>                 |                                                                         |
|------------------------------------------------|-------------------------------------------------------------------------|
| GO enrichment of over-expressed genes          | GO enrichment of under-expressed genes                                  |
| 1. Inflammatory response                       | 1. Transcription, DNA-templated                                         |
| 2. Extracellular matrix organization           | 2. Negative regulation of transcription from RNA polymerase II promoter |
| 3. Cell adhesion                               | 3. Negative regulation of transcription, DNA-templated                  |
| 4. Interferon-gamma-mediated signaling Pathway | 4. Nervous system development                                           |
| 5. Angiogenesis                                | 5. Positive regulation of transcription from RNA polymerase II promoter |
| 6. Leukocyte migration                         | 6. Transcription from RNA polymerase II Promoter                        |
| 7. Signal transduction                         | 7. Regulation of cell cycle                                             |
| 8. Aging                                       | 8. Regulation of transcription, DNA-templated                           |
| 9. Platelet degranulation                      | 9. Chromatin remodeling                                                 |
| 10. Cellular response to lipopolysaccharide    | 10. G2/M transition of mitotic cell cycle                               |

**Table S2.** Top 10 enriched GO terms (BH-FDR<0.0001) in the GO biological process category of differentially expressed genes between subtypes 1 and 3 (gene expression in subtype 1 as baseline) in GBM cancer datasets.

| <b>Subtype 1 vs. Subtype 3</b>        |                                                                         |
|---------------------------------------|-------------------------------------------------------------------------|
| GO enrichment of over-expressed genes | GO enrichment of under-expressed genes                                  |
| 1. Inflammatory response              | 1. Transcription, DNA-templated                                         |
| 2. Immune response                    | 2. Regulation of transcription, DNA-templated                           |
| 3. Response to lipopolysaccharide     | 3. Covalent chromatin modification                                      |
| 4. Extracellular matrix organization  | 4. mRNA splicing, via spliceosome                                       |
| 5. Leukocyte migration                | 5. Negative regulation of transcription from RNA polymerase II promoter |
| 6. Cell adhesion                      | 6. Negative regulation of transcription, DNA-templated                  |
| 7. Signal transduction                | 7. Positive regulation of transcription from RNA polymerase II promoter |
| 8. Innate immune response             | 8. Chromatin remodeling                                                 |
| 9. Chemotaxis                         | 9. Protein sumoylation                                                  |
| 10. Neutrophil chemotaxis             | 10. mRNA processing                                                     |
